# Supplementary material for: Anti-icing agent releasing diatomaceous earth/SBS composites
Source: Royal Society of Chemistry journal article supplement (doi:10.1039/c8nj01323c), 2018-01-01
Supplement: c8nj01323c1.pdf [file c8nj01323c1.pdf]

## Electronic Supplementary Information

### Anti-icing agent releasing diatomaceous earth/SBS composites

A. Ijaz,<sup>a</sup> A. Miko<sup>b</sup> and A. L. Demirel<sup>a,b</sup>

<sup>a</sup> Materials Science and Engineering Program, Koç University, Istanbul, Turkey.

<sup>b</sup> Chemistry Department, Koç University, Istanbul, Turkey.

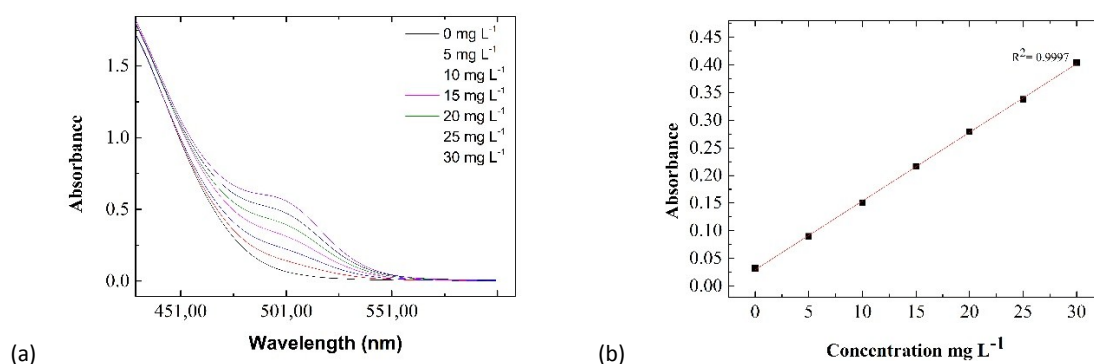

**Fig. S1** Calibration for PEG-10K released from the composite into water at room temperature by UV-Visible spectroscopy using modified Dragendorff method: (a) Absorption spectra of the complex formed by mixing PEG-10K at various concentrations and Dragendorff reagent (DR). (b) Calibration curve at 514 nm for PEG-10K.

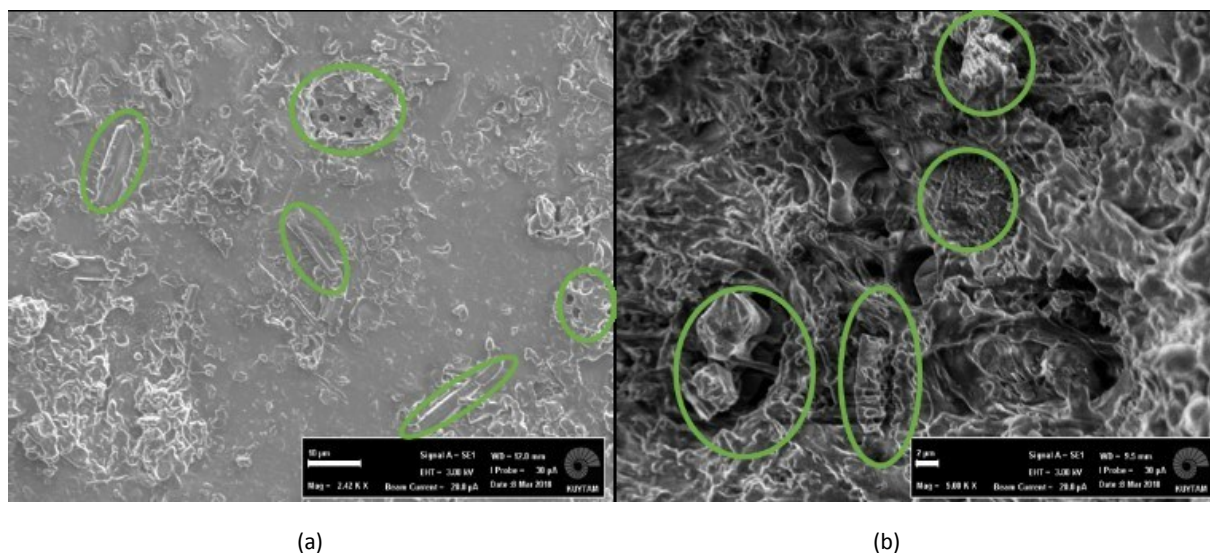

**Fig. S2** Low magnification SEM images of PEG-10K filled DE/SBS composite: a) the top surface b) the fractured cross section. The circled areas highlight the DE particles in the SBS matrix. The scale bar corresponds to 10  $\mu\text{m}$  in (a) and 2  $\mu\text{m}$  in (b).

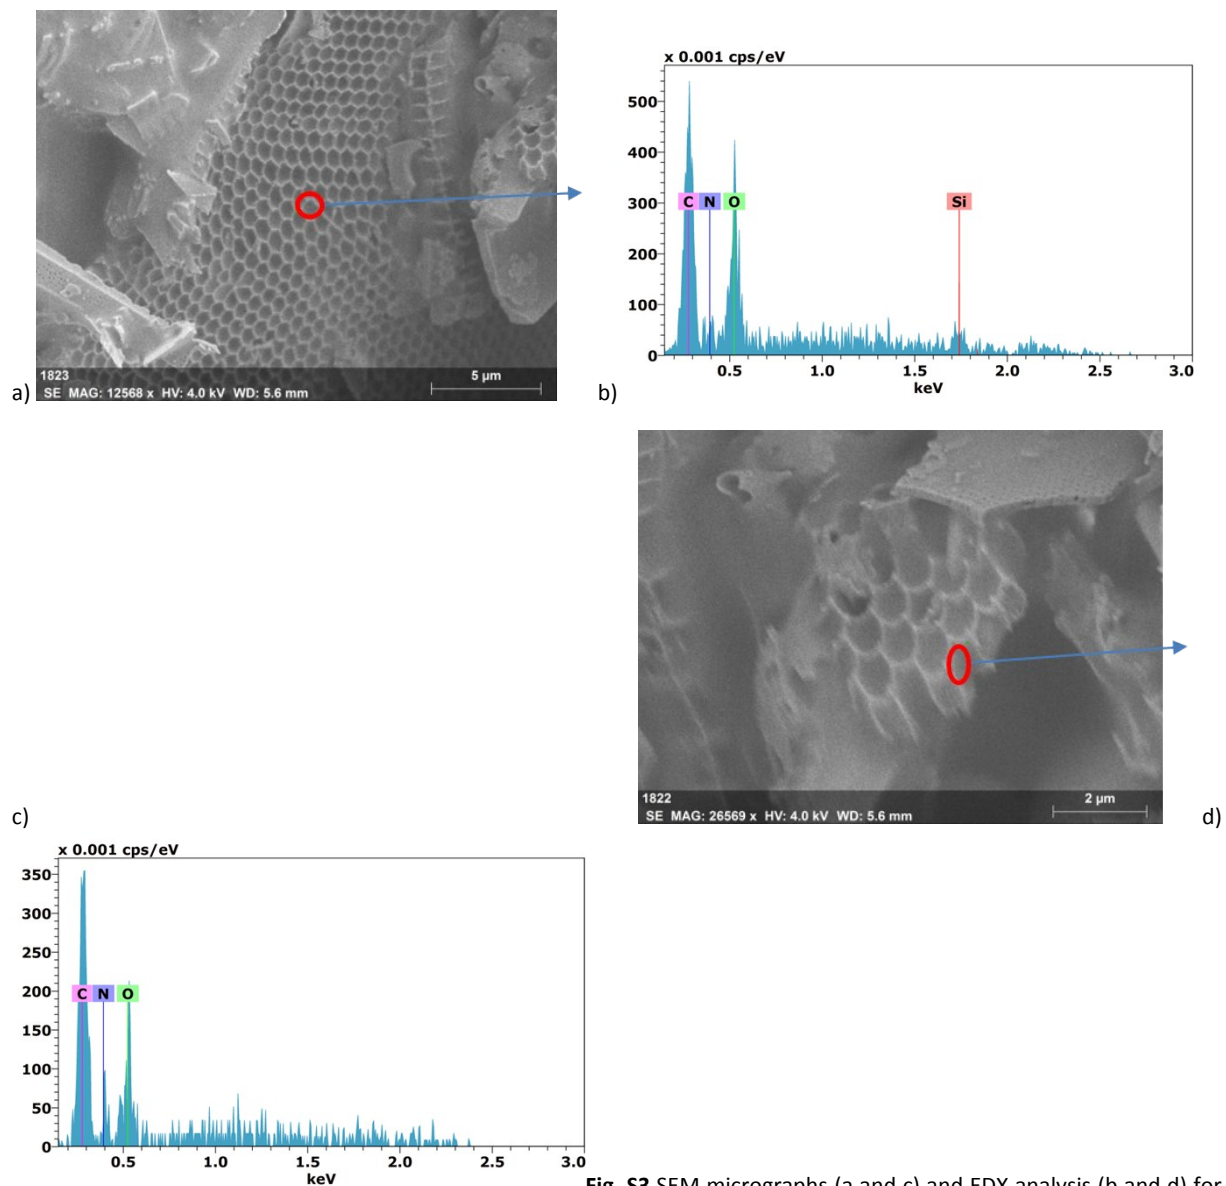

**Fig. S3** SEM micrographs (a and c) and EDX analysis (b and d) for diatomaceous earth (DE) particles kept in PEOX-5K solutions in acetone and centrifuged. The nitrogen peak in EDX results shows the presence of PEOX in DE pores.

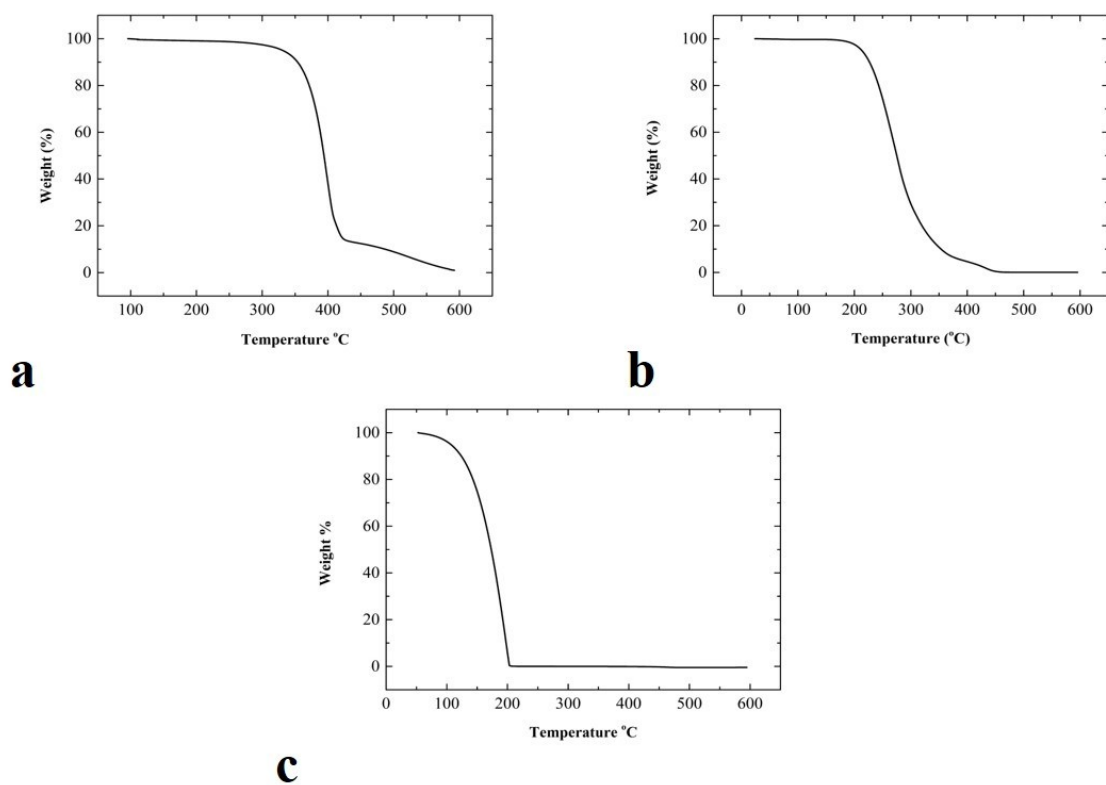

**Fig. S4** TGA characterization of the anti-icing agents used showing the weight loss as a function of temperature: a) PEOX-5K, b) PEG-2K, c) EG.

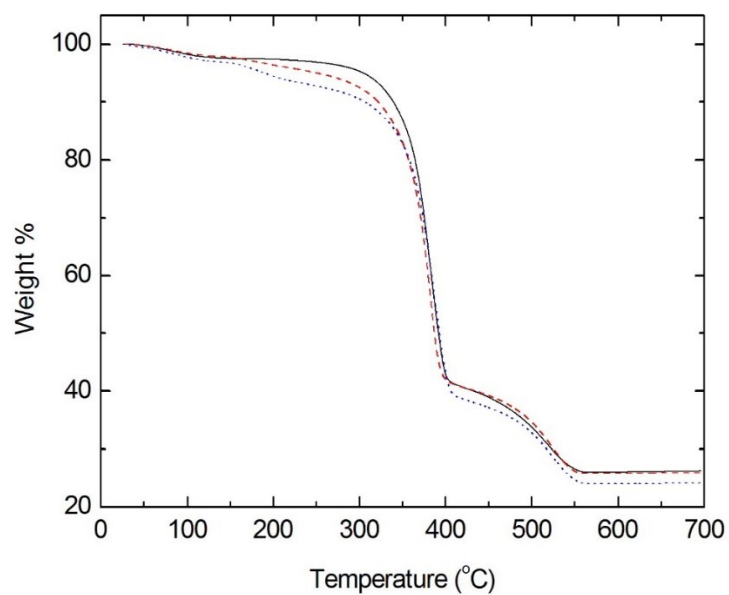

**Fig. S5** TGA characterization of the anti-icing agent filled DE/SBS composites showing the weight loss as a function of temperature: DE/SBS filled in 10 v% PEG-600 (solid line), DE/SBS filled in 30 v% PEG-600 (dashed line), DE/SBS filled in 50 v% PEG-600 (dotted line).

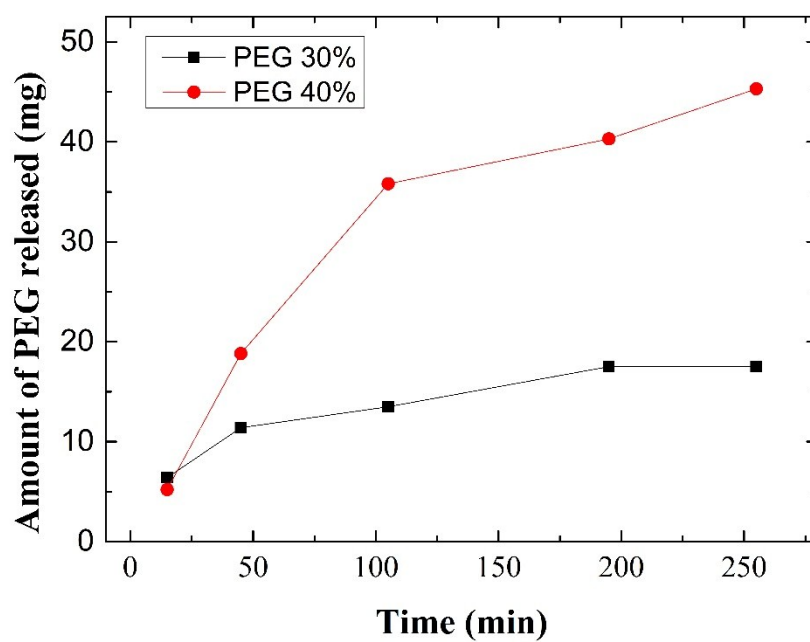

**Fig. S6** Mass (in mg) of PEG-600 released from filled DE/SBS composites into 10 mL water as a function of time. The amount released was determined gravimetrically. DE/SBS composites filled in 30 volume % EG in binary mixture (squares); DE/SBS composites filled in 40 volume % EG in binary mixture (circles).

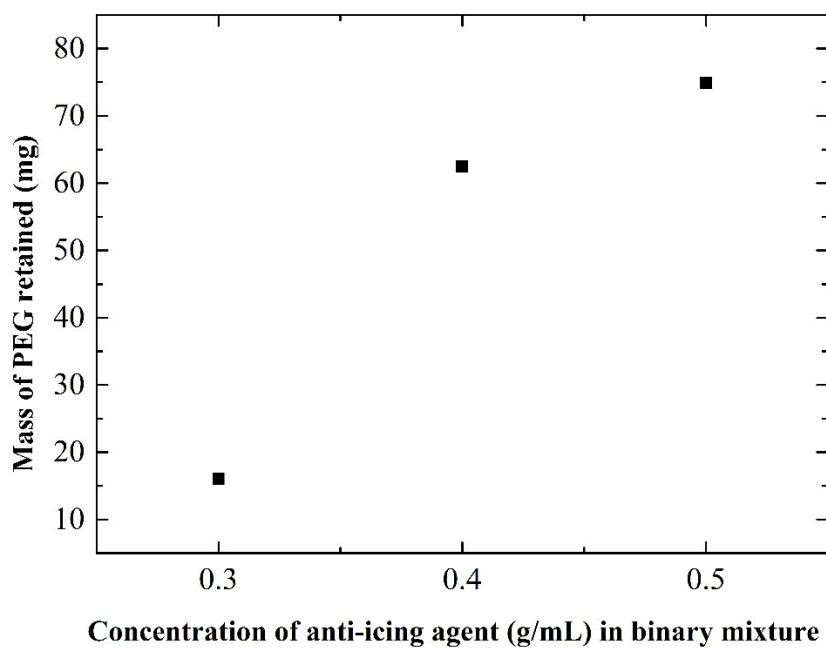

**Fig. S7** Mass (in mg) of PEG-10K retained in DE/SBS composites filled in different concentrations of PEG-10K solutions in binary mixture of diethyl ether and acetone.
